# Supplementary material for: Serum heat inactivation diminishes ApoE-mediated uptake of D-Lin-MC3-DMA lipid nanoparticles
Source: publisher site journal article supplement (doi:10.3762/bjnano.16.57), 2025-05-30
Supplement: Additional file 1 [file 2190-4286-16-57-S1.pdf]

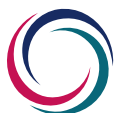

## Supporting Information

for

### **Serum heat inactivation diminishes ApoE-mediated uptake of D-Lin-MC3-DMA lipid nanoparticles**

Demian van Straten, Luuk van de Schepop, Rowan Frunt, Pieter Vader and Raymond M. Schiffelers

*Beilstein J. Nanotechnol.* **2025**, *16*, 740–748. doi:10.3762/bjnano.16.57

### **Physicochemical characteristics of MC3 and C12 LNPs**

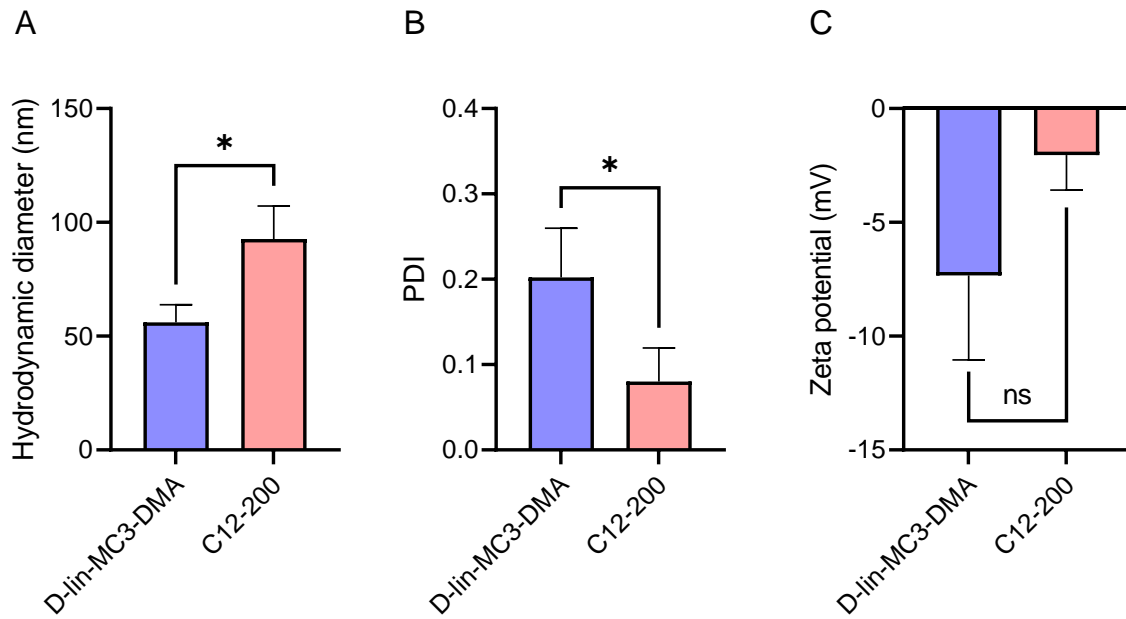

**Figure S1: The physicochemical characteristics of MC3 and C12 LNPs.** The hydrodynamic diameter of MC3 and C12 LNPs as determined by DLS (A). The polydispersity index (PDI) of MC3 and C12 LNPs as determined by DLS (B). The zeta potential of MC3 and C12 LNPs as determined by electrophoretic light scattering (C). Differences were considered statistically significant at  $p < 0.05$  and were annotated as ns = non-significant, \* =  $p \leq 0.05$ , \*\* =  $p \leq 0.01$ , \*\*\* =  $p \leq 0.001$  and \*\*\*\* =  $p \leq 0.0001$ .
